# Supplementary material for: Structural principles of cation ordering and octahedral tilting in A-site ordered double perovskites: ferroelectric CaMnTi2O6 as a model system
Source: Royal Society of Chemistry journal article supplement (doi:10.1039/d2dt02283d), 2022-01-01
Supplement: d2dt02283d1.pdf [file d2dt02283d1.pdf]

**Supporting Information for "Structural principles of cation ordering and octahedral tilting in A-site ordered double perovskites: ferroelectric  $\text{CaMnTi}_2\text{O}_6$  as a model system."**

Elisabeth K. Albrecht and Antti J. Karttunen\*

*Department of Chemistry and Materials Science,  
Aalto University, P.O. Box 16100, FI-00076 Aalto, Finland*

---

\* antti.karttunen@aalto.fi

## I. CRYSTAL STRUCTURES OF THE STUDIED SYSTEMS

The optimized crystal structures of the studied systems are provided as separate files in CIF format.

## II. ABSOLUTE ELECTRONIC ENERGIES OF THE STUDIED SYSTEMS

Table I. Absolute energies of studied systems with columnar A-site ordering. The energies are normalized per formula unit ( $Z$ ).

| Tilt System | $k$ -mesh             | Absolute Energy/ $Z$ | Relative Energy |
|-------------|-----------------------|----------------------|-----------------|
|             |                       | (Hartree)            | (kJ/mol)        |
| $a^+a^+a^+$ | $5 \times 5 \times 5$ | -3978.559814         | 31              |
| $a^+a^+c^-$ | $4 \times 4 \times 4$ | -3978.568378         | 9               |
| $a^-b^+a^-$ | $6 \times 4 \times 6$ | -3978.563829         | 21              |
| $a^-b^-b^-$ | $6 \times 6 \times 4$ | -3978.551783         | 52              |
| $a^-a^-a^-$ | $6 \times 6 \times 4$ | -3978.551780         | 52              |
| $a^0b^+b^+$ | $4 \times 4 \times 4$ | -3978.554731         | 44              |
| $a^+b^0c^-$ | $4 \times 4 \times 4$ | -3978.563927         | 20              |
| $a^0b^-b^-$ | $4 \times 6 \times 6$ | -3978.550529         | 55              |
| $a^0a^0c^+$ | $4 \times 4 \times 8$ | -3978.536814         | 91              |
| $a^0a^0c^-$ | $6 \times 6 \times 4$ | -3978.538517         | 87              |
| $a^0a^0a^0$ | $6 \times 6 \times 8$ | -3978.501563         | 184             |

Table II. Absolute energies of studied systems with planar A-site ordering. The energies are normalized per formula unit ( $Z$ ).

| Tilt System | $k$ -mesh             | Absolute Energy/ $Z$ | Relative Energy |
|-------------|-----------------------|----------------------|-----------------|
|             |                       | (Hartree)            | (kJ/mol)        |
| $a^+a^+a^+$ | $4 \times 4 \times 4$ | -3978.546794         | 65              |
| $a^+a^+c^-$ | $4 \times 4 \times 4$ | -3978.553181         | 49              |
| $a^-b^+a^-$ | $4 \times 4 \times 4$ | -3978.561826         | 26              |
| $a^-b^-b^-$ | $6 \times 6 \times 4$ | -3978.555895         | 41              |
| $a^-a^-a^-$ | $4 \times 6 \times 6$ | -3978.555924         | 41              |
| $a^0b^+b^+$ | $4 \times 4 \times 4$ | -3978.544915         | 70              |
| $a^+b^0c^-$ | $4 \times 6 \times 6$ | -3978.557188         | 38              |
| $a^0b^-b^-$ | $4 \times 6 \times 6$ | -3978.553096         | 49              |
| $a^0a^0c^+$ | $4 \times 4 \times 4$ | -3978.537465         | 90              |
| $a^0a^0c^-$ | $6 \times 6 \times 4$ | -3978.540274         | 82              |
| $a^0a^0a^0$ | $8 \times 8 \times 4$ | -3978.501764         | 183             |

Table III. Absolute energies of studied systems with rock-salt A-site ordering. The energies are normalized per formula unit ( $Z$ ).

| Tilt System | $k$ -mesh             | Absolute Energy/ $Z$ | Relative Energy |
|-------------|-----------------------|----------------------|-----------------|
|             |                       | (Hartree)            | (kJ/mol)        |
| $a^+a^+a^+$ | $4 \times 4 \times 4$ | -3978.547783         | 63              |
| $a^+a^+c^-$ | $4 \times 4 \times 4$ | -3978.554239         | 46              |
| $a^-b^+a^-$ | $4 \times 6 \times 6$ | -3978.561888         | 26              |
| $a^-b^-b^-$ | $6 \times 6 \times 4$ | -3978.554775         | 44              |
| $a^-a^-a^-$ | $6 \times 6 \times 4$ | -3978.554252         | 46              |
| $a^0b^+b^+$ | $4 \times 4 \times 4$ | -3978.547653         | 63              |
| $a^+b^0c^-$ | $4 \times 6 \times 6$ | -3978.558367         | 35              |
| $a^0b^-b^-$ | $6 \times 6 \times 6$ | -3978.556047         | 41              |
| $a^0a^0c^+$ | $6 \times 6 \times 4$ | -3978.542046         | 78              |
| $a^0a^0c^-$ | $6 \times 6 \times 6$ | -3978.544687         | 71              |
| $a^0a^0a^0$ | $4 \times 4 \times 4$ | -3978.501787         | 183             |

### III. BASIS SET DETAILS FOR CA

For Ca, we used the following SVP level basis set, modified from Karlsruhe def-SVP for periodic calculations,

```
20 9
0 0 6 2.0 1.0
35138.713929      0.39482520740E-02
5276.4111348     0.30234243552E-01
1200.4692589     0.14952019681
338.71810542     0.51597345713
109.85385922     1.0339510296
37.608880299     0.76937933526
0 0 3 2.0 1.0
73.107977555     -0.28268525011
8.2407705688     1.6796092142
3.2959812993     1.2803766016
0 0 2 2.0 1.0
5.2341800914     -0.76868604561E-02
0.84187220515    0.25382375978E-01
0 1 1 2.0 1.0
0.35              1.0 1.0
0 1 1 0.0 1.0
0.15              1.0 1.0
0 2 5 6.0 1.0
413.11313893     0.20327135354E-01
96.935786224     0.14730276362
30.372154659     0.54887167322
10.684776830     1.0440659818
3.8821258350     0.68653490684
0 2 2 6.0 1.0
1.7993016295     .75410246871
0.69189056530    1.3409296599
0 3 2 0.0 1.0
5.4979093879     0.73770011433E-01
1.3177128032     0.26052853169
0 3 1 0.0 1.0
0.32188682649    0.45233836380
```
